# Supplementary material for: Tricalcium silicate/graphene oxide bone cement with photothermal properties for tumor ablation
Source: Royal Society of Chemistry journal article supplement (doi:10.1039/c9tb00246d), 2019-01-01
Supplement: c9tb00246d1.pdf [file c9tb00246d1.pdf]

Electronic Supplementary Information

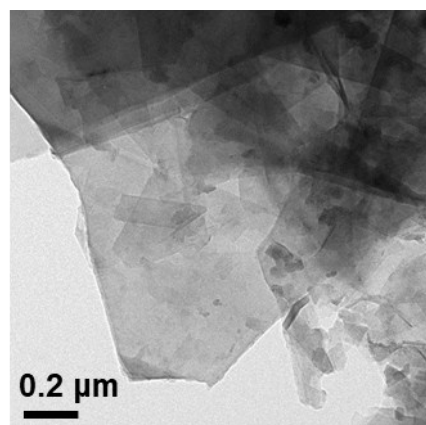

Figure S1 TEM image of the GO nanosheets after ultrasonic treatment.

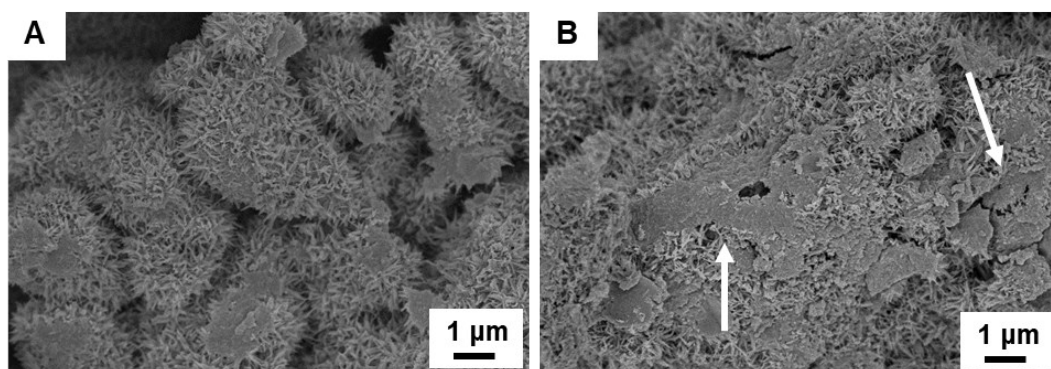

Figure S2 High magnification images of cross-section morphologies of CS (A) and CS-10GO (B) bone cement after hydration for 1 day. The white arrows in Figure S2B showed the morphology of hydration products around GO in the composite cement.

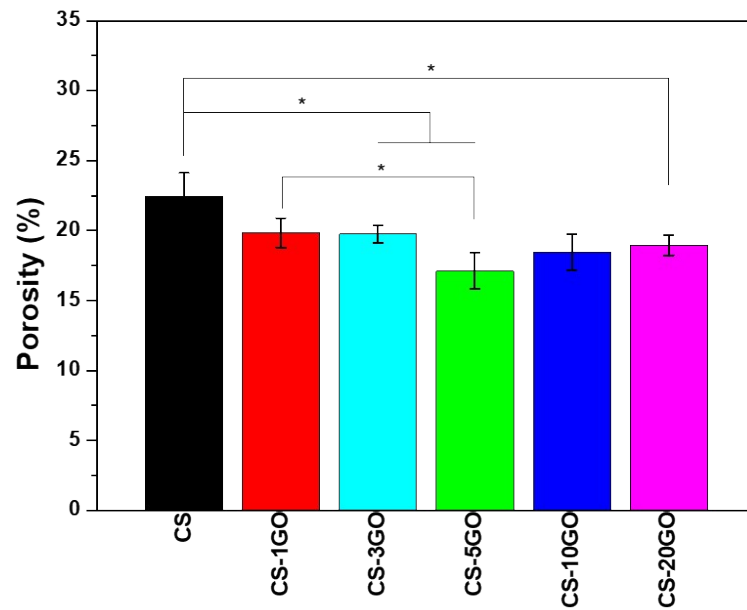

Figure S3 Porosity of the CS and CS/GO bone cements cured at 37°C for 1 d.

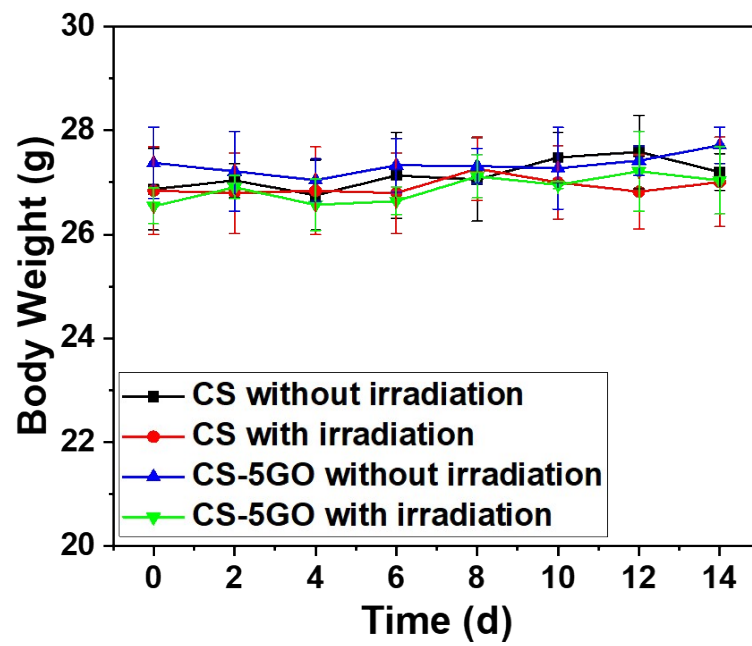

Figure S4 The body weight of nude mice during the therapy process.
